# Supplementary material for: Biofilm Production by Enterotoxigenic Strains of Bacillus cereus in Different Materials and under Different Environmental Conditions
Source: PubMed Central journal article supplement (PMC7409032; doi:10.3390/microorganisms8071071), 2020-07-17
Supplement: microorganisms-08-01071-s001.pdf [file microorganisms-08-01071-s001.pdf]

## Supplementary material (S1)

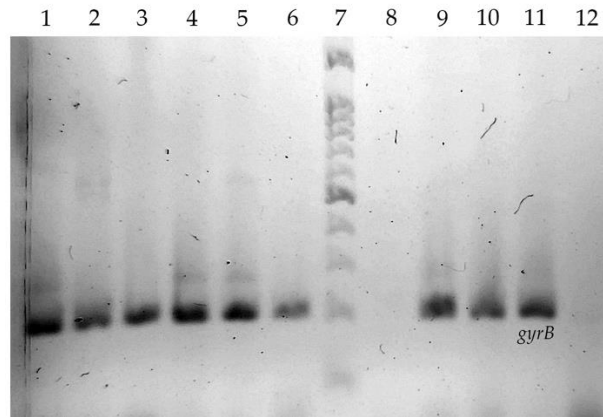

**Figure 1. *gyrB* gene amplification.** 1. B013, 2. B030, 3. B092, 4. B093, 5. B171, 6. B186, 7. Molecular weight marker, 8. B027, 9. B362, 10. B326 11. ATCC 14579, 12. B067.

Supplementary material (S2)

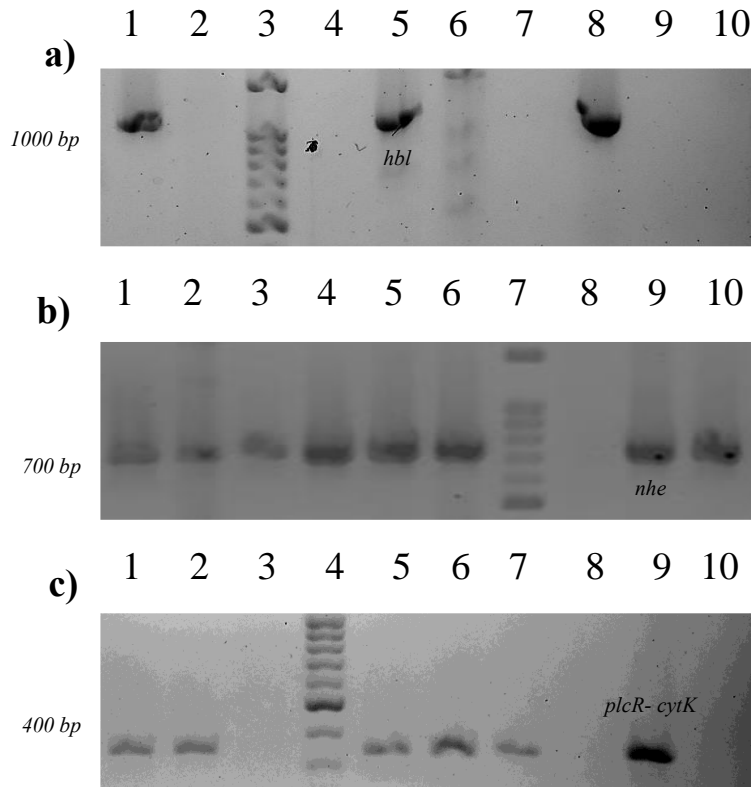

**Figure 2. Enterogenic profile.** a) *hbl*, 1. ATCC 14579, 2. B013, 3. Molecular weight marker, 4. B092, 5. B030, 6. B093, 7. B171, 8. B326, 9. B362 10. B186. b) *nhe*, 1.B013, 2.B030, 3. B092, 4. B093, 5. B171, 6. B186, 7. Molecular weight marker, 8. ATCC 14579, 9. B362, 10. B326. c) *plcR-cytK*, 1. ATCC 14579, 2. B013, 3. B092, 4. Molecular weight marker, 5. B030, 6. B171, 7. B186, 8. B093, 9. B326, 10. B362.
